# Supplementary material
Source: PubMed Central journal article supplement (PMC5004660)
Supplement: ASN.2015080911SupplementaryData.pdf [file ASN.2015080911SupplementaryData.pdf]

**Title**

IgA structure variations along immune stimulations and IgA mesangial deposition

**Authors**

Zeliha Oruc<sup>1</sup>, Christelle Oblet<sup>1,7</sup>, Ahmed Boumediene<sup>1,7</sup>, Anne Druilhe<sup>1</sup>, Virginie Pascal<sup>1</sup>, Elisabeth Le Rumeur<sup>3</sup>, Armelle Cuvillier<sup>2</sup>, Chahrazed El Hamel<sup>1</sup>, Sandrine Lecardeur<sup>1</sup>, Tomas Leanderson<sup>4</sup>, Willy Morelle<sup>5</sup>, Jocelyne Demengeot<sup>6</sup>, Jean-Claude Aldigier<sup>1</sup>, and Michel Cogné<sup>1</sup>

**Affiliations**

- <sup>1</sup> Limoges University, Limoges University Hospital Dupuytren; CNRS UMR 7276, Control of the B Cell Response and Lymphoproliferation. 87025, Limoges, France.
- <sup>2</sup> B Cell Design, 87000 Limoges, France.
- <sup>3</sup> Université de Rennes 1 UMR CNRS 6290, Institut Génétique et Développement de Rennes Equipe Structure et Interactions Moléculaires (SIM) Campus Biologie-Santé CS 34317, 35043 Rennes Cedex, France.
- <sup>4</sup> Lund University, Immunology group, Lund, Sweden.
- <sup>5</sup> Université Lille 1 : CNRS UMR 8576, Laboratoire de Glycobiologie Structurale et Fonctionnelle, USTL, IFR 147, 59655 Villeneuve d'Ascq, France.
- <sup>6</sup> Instituto Gulbenkian de Ciência, 2780-901 Oeiras, Portugal.
- <sup>7</sup> C.O. and A.B. equally contributed to the experimental part of this work.

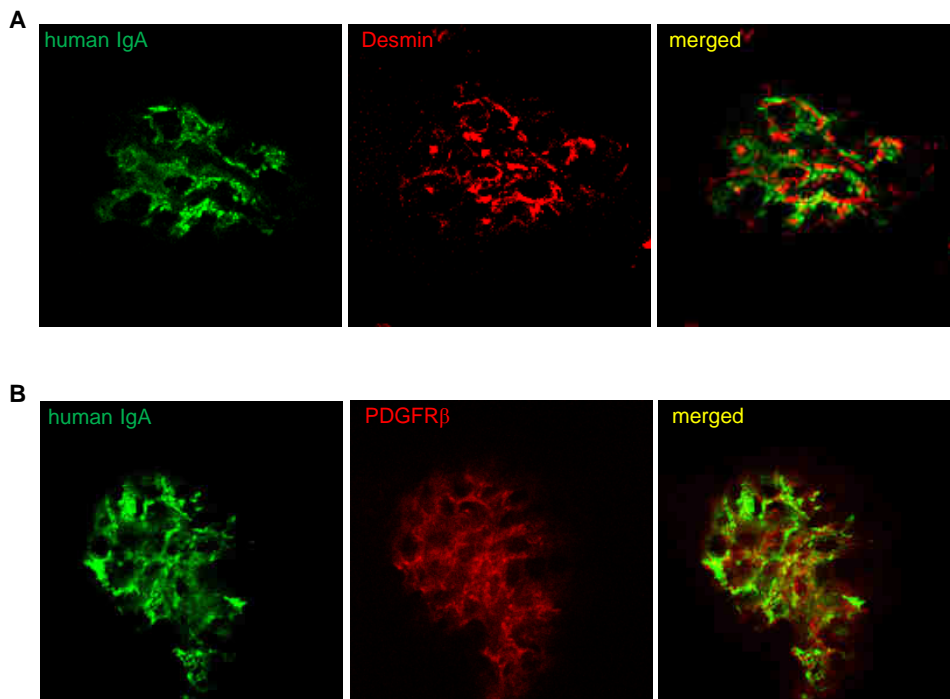

**Supplemental figure 1**

Co-localization of mesangial markers and IgA1 deposits in adult  $\alpha$ 1KI mice. Kidney sections were stained with FITC-conjugated anti-human IgA (*green*) and either (A) anti-desmin (*red*) or (B) anti-PDGFR receptor  $\beta$  (*red*). Pictures are representative of all glomeruli found in kidney sections.

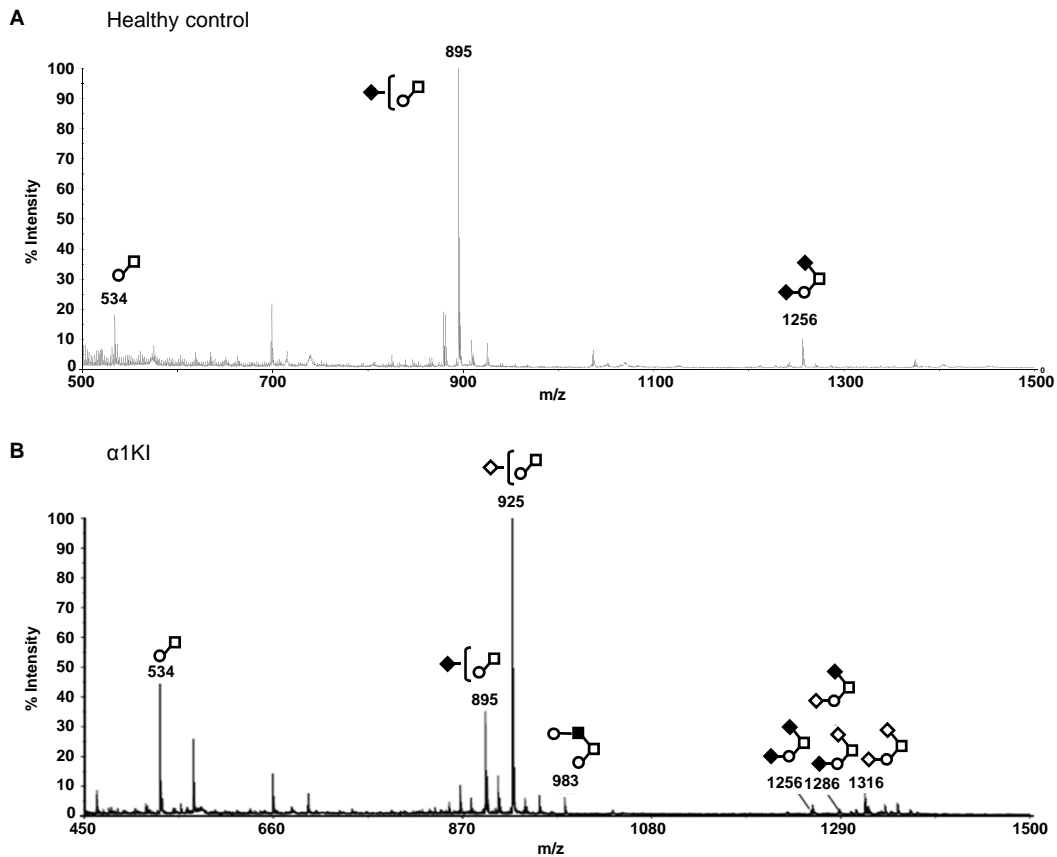

**Supplemental Figure 2**

Mass spectrometry of IgA1 O-glycosylation. MALDI-TOF-MS profiles of permethylated IgA1 O-linked glycans from a healthy human subject (**A**) and  $\alpha$ 1KI mice (**B**). Only major glycans are given. Galactose ( $\circ$ ); mannose ( $\bullet$ ); GlcNAc ( $\blacksquare$ ); GalNAc ( $\square$ ); fucose ( $\triangle$ ); NeuAc ( $\blacklozenge$ ); NeuGc ( $\blacklozenge$ ).
